# Supplementary material for: A transcriptional reference map of defence hormone responses in potato
Source: PubMed Central journal article supplement (PMC4610000; doi:10.1038/srep15229), 2015-10-19
Supplement: srep15229-s3.pdf [file srep15229-s3.pdf]

## **A transcriptional reference map of defence hormone responses in potato**

Lea Wiesel<sup>1</sup>, Jayne L. Davis<sup>1</sup>, Linda Milne<sup>1</sup>, Vanesa Redondo Fernandez<sup>1</sup>, Miriam B. Herold<sup>1</sup>, Jill Middlefell Williams<sup>1</sup>, Jenny Morris<sup>1</sup>, Pete E. Hedley<sup>1</sup>, Brian Harrower<sup>1</sup>, Adrian C. Newton<sup>1</sup>, Paul R. J. Birch<sup>2</sup>, Eleanor M. Gilroy<sup>1</sup>, Ingo Hein<sup>1</sup>

<sup>1</sup> The James Hutton Institute, Invergowrie, Dundee, DD2 5DA, UK

<sup>2</sup> The Division of Plant Sciences, College of Life Science, University of Dundee at the James Hutton Institute, Dundee, UK

\*Correspondence:

Ingo Hein

The James Hutton Institute

Invergowrie

Dundee

DD2 5DA

UK

Ingo.Hein@hutton.ac.uk

+44 (0)1382 568869

**Figure S1:** Screenshots of the potato gene expression database (<http://ics.hutton.ac.uk/solarray>) to illustrate the layout and information accessible via the database.

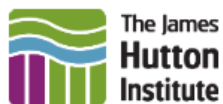

Transcript

DMT400000694

- Source Contig  
**ST4.03ch01**
- Source Gene  
**DMG400000248**

Available Data

- [\[Microarray Probes\]](#)
- [\[Spudb GBrowse\]](#)
- [\[Homologues\]](#)
- [\[DNA Sequence\]](#)

solarray

- [solarray Home](#)
- [BLAST Search](#)
- [Keyword Search](#)
- [Samples and Analysis](#)

Links

- [James Hutton Institute Home](#)
- [BioSS Home](#)

**Microarray Probes on PGSC0003DMT400000694**

| Probe ID              | Chip          | Probe Sequence                                                |
|-----------------------|---------------|---------------------------------------------------------------|
| CUST_3228_PI426222305 | JHI_St_60k_v1 | GGAGGGTTGATGTTGTTGCAACGAGTTTGAATTTTAAATTTTATGCACGATGTAGATAATA |

**Spudb GBrowse for Transcript PGSC0003DMT400000694**

[View details at PGSC Spudb GBrowse](#)

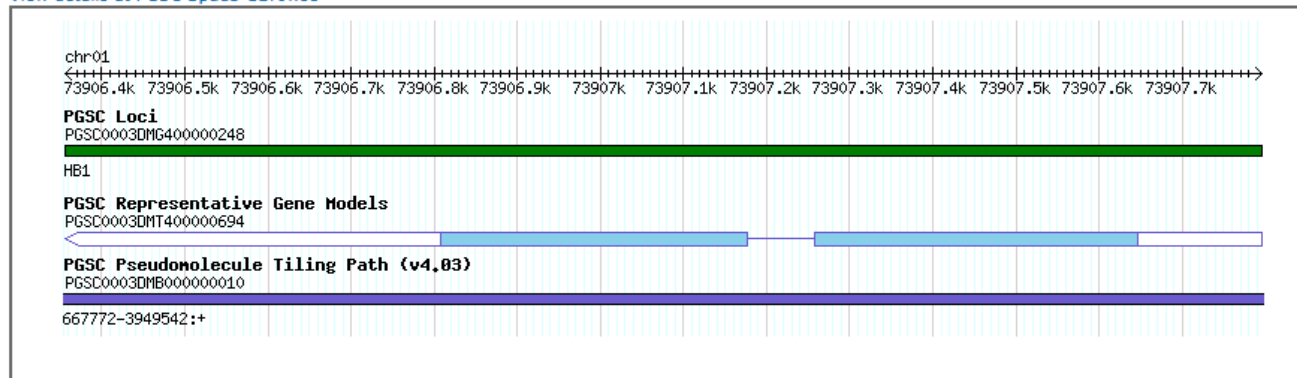

**Source Transcript PGSC0003DMT400000694 - Homology to Model Species (BLASTX to E-value < 1e-50)**

| Database      | Link to BLAST Hit           | Frame | E-value | Score | % Identity    | Description                                             |
|---------------|-----------------------------|-------|---------|-------|---------------|---------------------------------------------------------|
| Tomato (ITAG) | None                        | -     | -       | -     | -             | -                                                       |
| TAIR PP10     | <a href="#">AT3G61890.1</a> | +3    | 2e-64   | 210   | 114/219 (52%) | homeobox 12   chr3:22914346-22915239 REVERSE LENGTH=235 |

**Transcript Sequence (1359 bp)**

```
>PGSC0003DMT400000694 1359 pgsc_dm_v3.4
GTTACAAGTTAAAGAATTCCCACCCAGAGCTGAACACCATAAAGATACCATTCTATCAAC
```

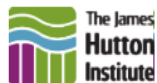

Source Transcript

**DMT40000694**

Source Contig  
**ST4.03ch01**  
 Source Gene  
**DMG40000248**

Available Data

- [\[Microarray Probes\]](#)
- [\[Microarray Signals\]](#)
- [\[Homologues\]](#)
- [\[Spud DB GBrowse\]](#)

solarray

- [solarray Home](#)
- [BLAST Search](#)
- [Keyword Search](#)
- [Samples and Analysis](#)

Links

- [James Hutton Institute Home](#)
- [BioSS Home](#)

| Probe ID              | Chip name     | Transcript ID | Probe Sequence                                             |
|-----------------------|---------------|---------------|------------------------------------------------------------|
| CUST_3228_PI426222305 | JHI_St_60k_v1 | DMT40000694   | GGAGGGTTGATGTTGTTGCAACGAGTTTGAGTTAAATTTATGCACGATGTAGATAATA |

**All Microarray Probes Designed to Gene DMG40000248**

| Probe ID              | Chip name     | Transcript ID | Probe Sequence                                             |
|-----------------------|---------------|---------------|------------------------------------------------------------|
| CUST_3228_PI426222305 | JHI_St_60k_v1 | DMT40000694   | GGAGGGTTGATGTTGTTGCAACGAGTTTGAGTTAAATTTATGCACGATGTAGATAATA |

**Microarray Signals from CUST\_3228\_PI426222305**

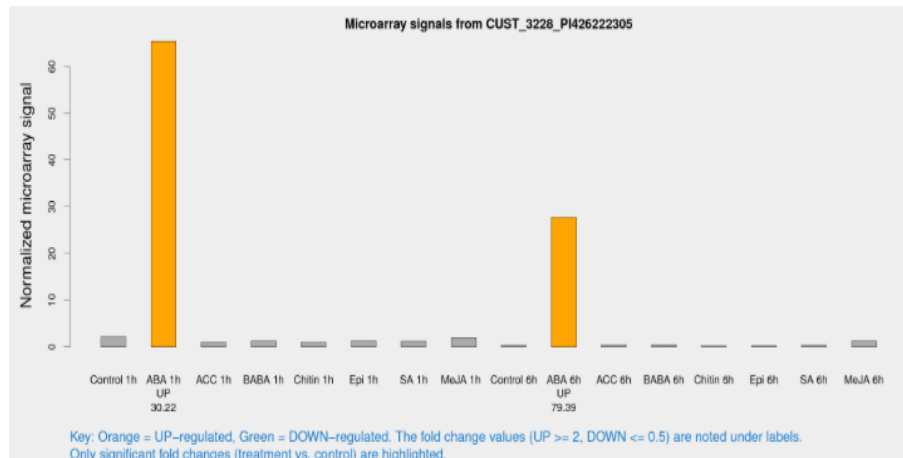

| Treatment  | Raw signal | Raw Std Err | Normalized signal | Normalized Std Err |
|------------|------------|-------------|-------------------|--------------------|
| Control 1h | 136.816    | 9.85226     | 2.16464           | 0.301652           |
| ABA 1h     | 3702.33    | 472.377     | 65.4119           | 6.91331            |
| ACC 1h     | 78.4187    | 33.517      | 0.988557          | 0.455013           |
| BABA 1h    | 77.1449    | 13.6081     | 1.23365           | 0.130704           |
| Chitin 1h  | 75.5278    | 34.7612     | 0.961735          | 0.825268           |
| Epi 1h     | 81.6501    | 27.5061     | 1.25912           | 0.659514           |
| SA 1h      | 77.1636    | 6.66213     | 1.18517           | 0.14662            |
| Me-JA 1h   | 99.6506    | 10.6408     | 1.91716           | 0.131227           |
| Control 6h | 27.1781    | 10.0001     | 0.349301          | 0.167193           |
| ABA 6h     | 1896.31    | 269.064     | 27.7307           | 3.2938             |
| ACC 6h     | 31.8264    | 4.71579     | 0.440542          | 0.0640434          |
| BABA 6h    | 37.4245    | 4.48784     | 0.525531          | 0.0645788          |
| Chitin 6h  | 15.0036    | 3.99104     | 0.216241          | 0.0631077          |
| Epi 6h     | 19.5626    | 8.70142     | 0.227878          | 0.0901232          |
| SA 6h      | 23.789     | 4.01112     | 0.377099          | 0.0664288          |
| Me-JA 6h   | 79.5084    | 16.7325     | 1.21923           | 0.360543           |

**Table S1:** All probes significantly affected by application of any of the five hormone treatments at 1 h and 6 h after treatment (p-value  $\leq 0.05$ ). Shown are fold changes in comparison to the control treatment, normalised and raw values including standard error and further information on each probe including the gene annotation.

**Table S2:** Normalised and raw expression values including standard error of potato homologs of previously described *A. thaliana* hormone markers. The marker specificity, *Arabidopsis* gene name and ID are shown alongside the corresponding potato gene (gene, transcript and protein) and their normalised and raw values at 1 and 6 hours post hormone treatments. Where readily identifiable, the reciprocal best hits (RBH) were selected or, if not discernible, the top potato protein blast hits (TH) were utilised.
